# Supplementary material for: An accurate and portable colorimetric chemosensor for S2− detection via two complementary mechanisms
Source: Royal Society of Chemistry journal article supplement (doi:10.1039/d0nj02544e), 2020-01-01
Supplement: d0nj02544e1.pdf [file d0nj02544e1.pdf]

**New Journal of Chemistry**

Supporting information for:

**An Accurate and Portable Colorimetric Chemosensor for  $S^{2-}$  Detection *via* Two Complementary Mechanisms**

Jian Chen,<sup>\*</sup> Ying Zhang, Shiyi Miao, Mingyue Wang, Baocheng Yang<sup>\*</sup>

Henan Key Laboratory of Nanocomposite and Applications, Institute of Nanostructured Functional Materials, Huanghe Science and Technology College, Zhengzhou, Henan 450006, China

Corresponding Authors

Jian Chen E-mail: [jianchen@infm.hhstu.edu.cn](mailto:jianchen@infm.hhstu.edu.cn)

Baocheng Yang E-mail: [baochengyang@infm.hhstu.edu.cn](mailto:baochengyang@infm.hhstu.edu.cn)

**Supporting Information Figures**

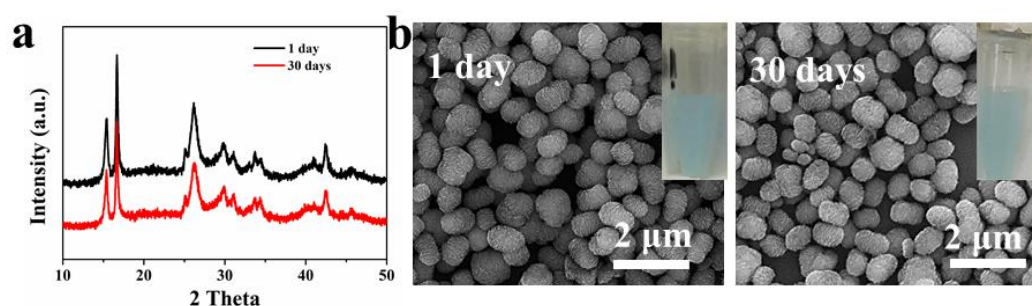

**Figure S1.** (a) Powder X-ray diffraction patterns for CuBDC MOFs kept for 1 day or 30 days. (b) SEM images of CuBDC MOFs kept for 1 day or 30 days. The inset images were photographs of CuBDC MOFs dispersed in water for 1 day or 30 days.

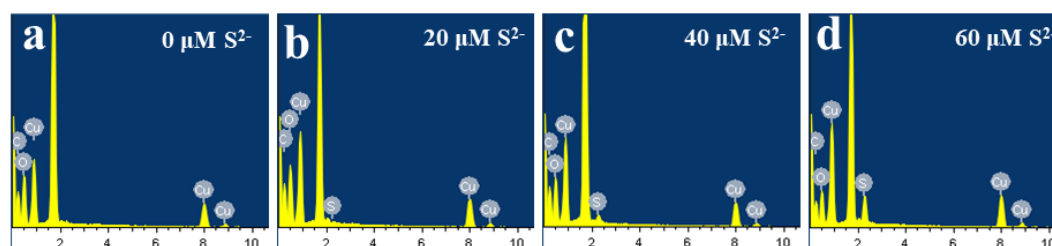

**Figure S2.** EDS spectra of CuBDC MOFs after interacting with different concentrations of  $S^{2-}$ .

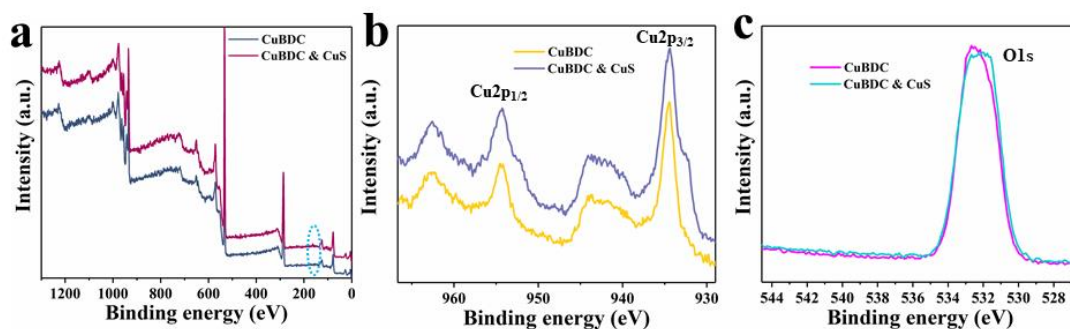

**Figure S3.** (a) Survey XPS spectra of CuBDC MOFs and the reaction product between CuBDC and  $S^{2-}$ . (b) High resolution Cu2p of CuBDC MOFs and the reaction product between CuBDC and  $S^{2-}$ . (c) High resolution O1s of CuBDC MOFs and the reaction product between CuBDC and  $S^{2-}$ .

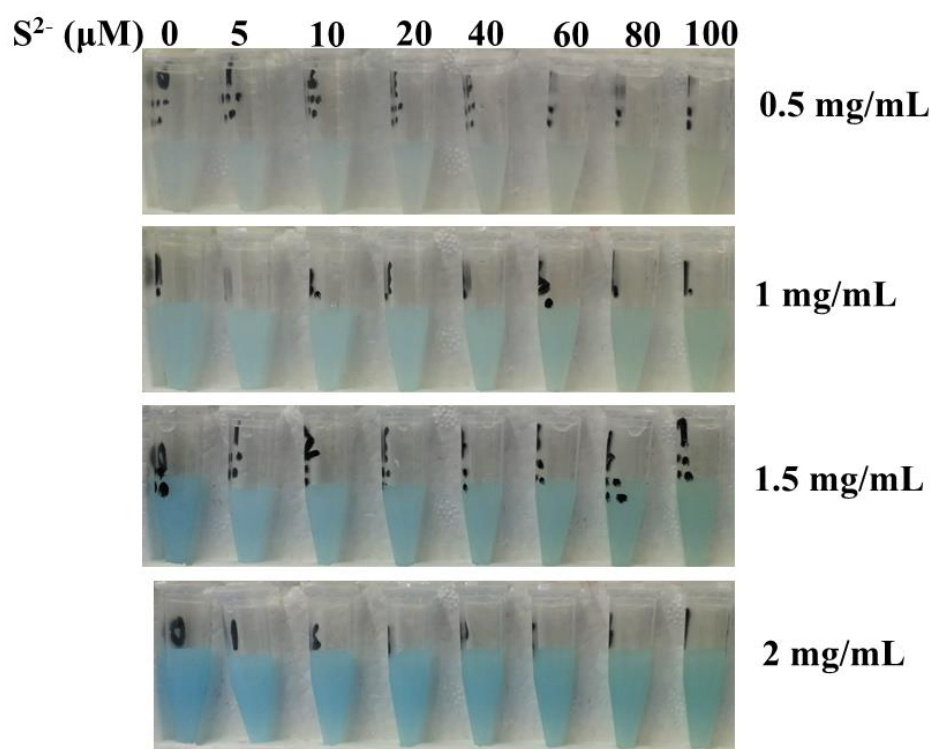

**Figure S4.** Photographs of aqueous solution containing different amount of CuBDC MOFs with various concentrations of  $S^{2-}$  added.

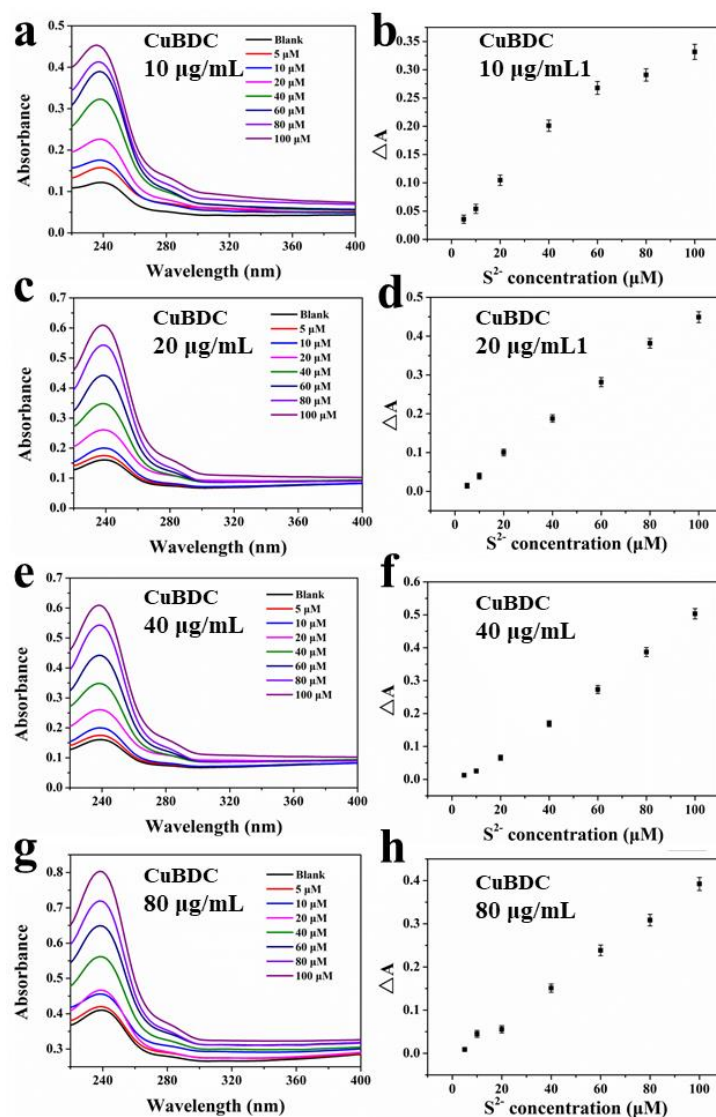

**Figure S5.** The UV-Vis absorption spectra of aqueous solution containing different amount of CuBDC MOFs with various concentrations of  $S^{2-}$  added, and the corresponding linear relationship between  $\Delta A_{240}$  and  $S^{2-}$  concentration in solutions.

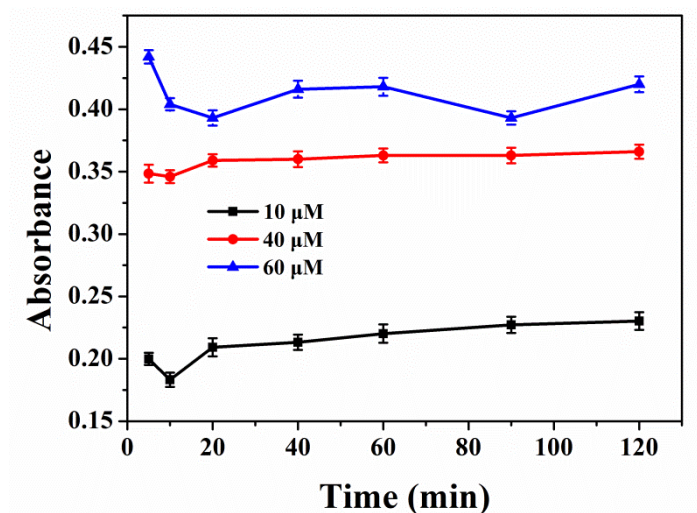

**Figure S6.** Effects of incubation time on the sensing efficiency for  $\text{S}^{2-}$ .

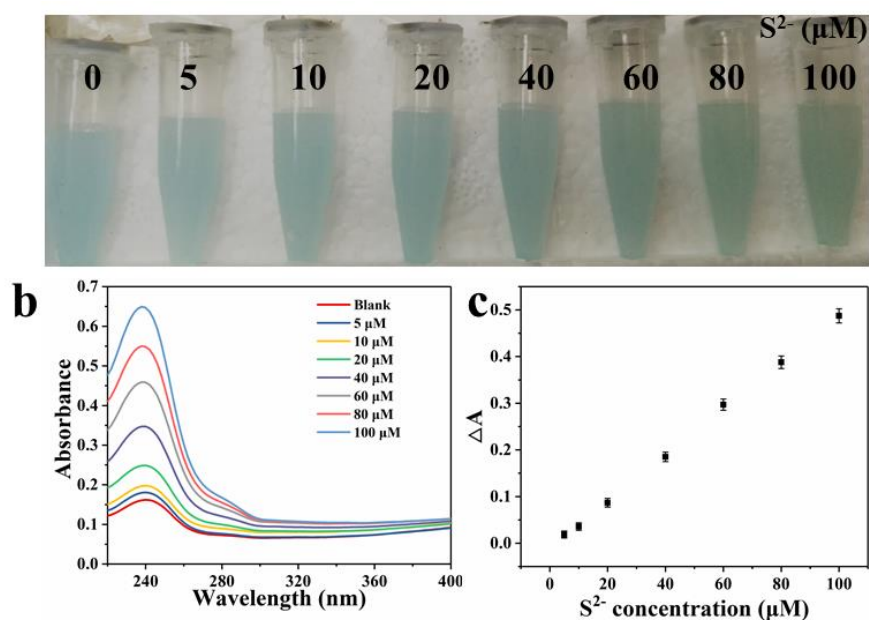

**Figure S7.** (a) Photographs of CuBDC solution kept for 30 days with different concentrations of  $\text{S}^{2-}$  added. (b) The UV-Vis absorption spectra of CuBDC solution kept 30 days with different concentrations of  $\text{S}^{2-}$  added. (c) Linear relationship between  $\Delta A_{240}$  and  $\text{S}^{2-}$  concentration in solutions.

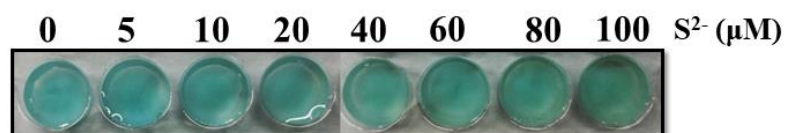

**Figure S8.** Photographs of PVA gels incubated with various concentrations of  $S^{2-}$  after 1 h.

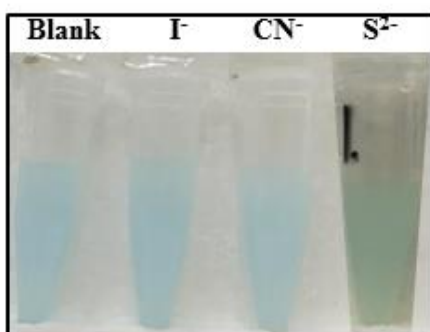

**Figure S9.** Photographs of CuBDC MOFs solution with  $I^-$ ,  $CN^-$  or  $S^{2-}$  added.

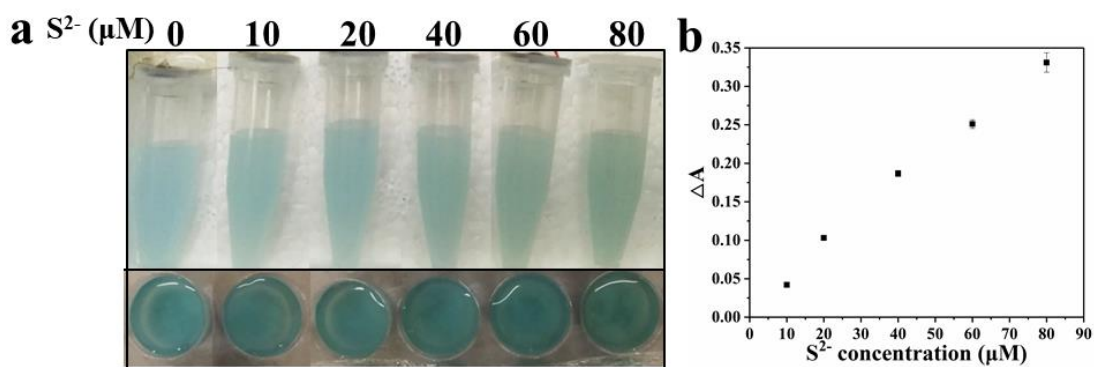

**Figure S10.** (a) CuBDC MOFs or PVA gels with underground water containing different concentrations of  $S^{2-}$  added. (b) Linear relationship between  $\Delta A_{240}$  and  $S^{2-}$  concentration in underground water.
